# Supplementary material
Source: Springer Nature journal article supplement (https://www.springermedizin.de/resource/supplementary/12871_2013_350_MOESM2_ESM.pdf/9429190)

# Opioid prescription (%)

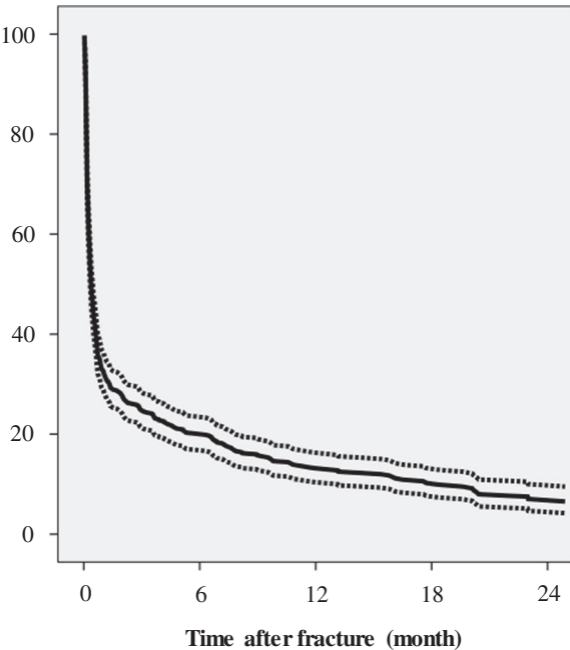

Number of patients

639

103

56

31

15

Supplement: MOESM2 [file 9429190]
